# Supplementary material for: One-pot synthesis of sustained-released doxorubicin silica nanoparticles for aptamer targeted delivery to tumor cells
Source: Royal Society of Chemistry journal article supplement (doi:10.1039/c0nr00913j), 2011-01-01
Supplement: c0nr00913j.pdf [file c0nr00913j.pdf]

## Supporting Information

### One-Pot Synthesis of Sustain-Released Doxorubicin Silica Nanoparticles for Aptamer Targeted Delivery to Tumor cells

Xiaoxiao He, Luo Hai, Jing Su, Kemin Wang\*, Xu Wu

*State Key Laboratory of Chemo/Biosensing and Chemometrics, College of Biology, College of Chemistry & Chemical Engineering, Hunan University. Key Laboratory for Bio-Nanotechnology and Molecule Engineering of Hunan Province, Changsha 410082, China. \*E-mail: kmwang@hnu.cn*

#### 1. Experimental Results

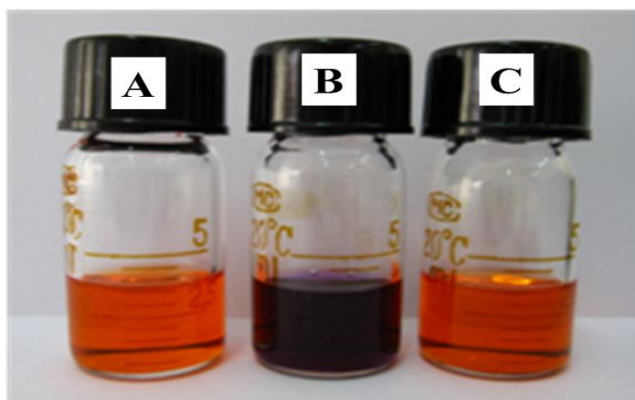

**Figure S1.** Images of Dox-contained reverse microemulsion after adding catalyst.

(A) Dox-contained reverse microemulsion; (B) Dox-contained reverse microemulsion after adding  $\text{NH}_4\text{OH}$ ; (C) Dox-contained reverse microemulsion after adding  $\text{NaF}$ .

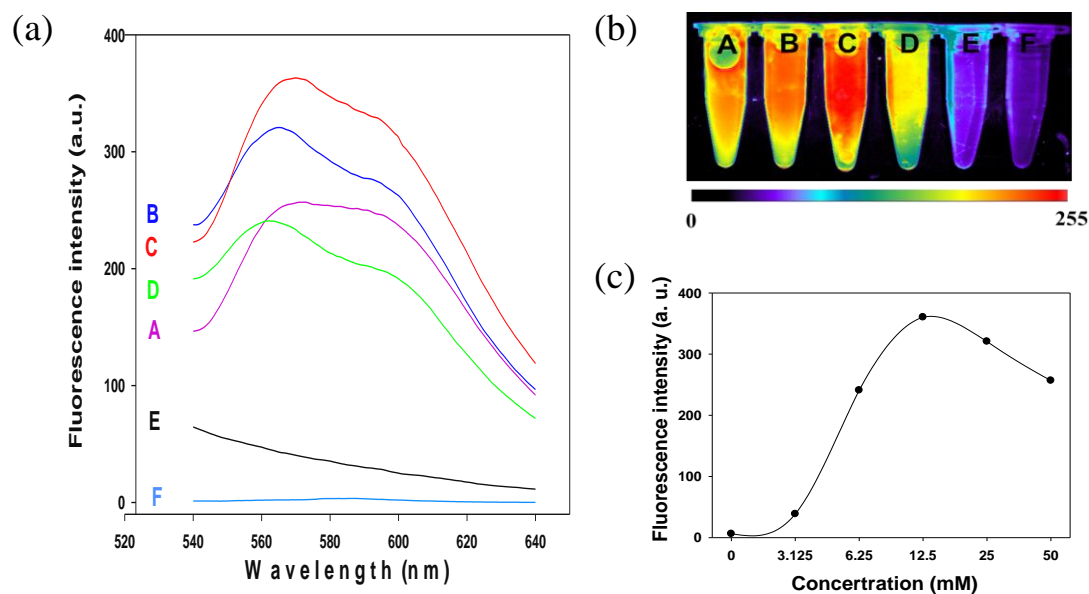

**Figure S2.** (a) Fluorescence emission spectra of NaF-Catalyzed COOH-Dox/SiNPs with different concentration of Dox: (A) 50mM; (B) 25mM; (C) 12.5mM; (D) 6.25mM; (E) 3.125mM and (F) water control; (b) Fluorescence images of NaF-Catalyzed COOH-Dox/SiNPs with different concentration of Dox: (A) 50mM; (B) 25mM; (C) 12.5mM; (D) 6.25mM; (E) 3.125mM and (F) water; (c) The max fluorescence intensity of COOH-Dox/SiNPs with different concentration of Dox doped inside.

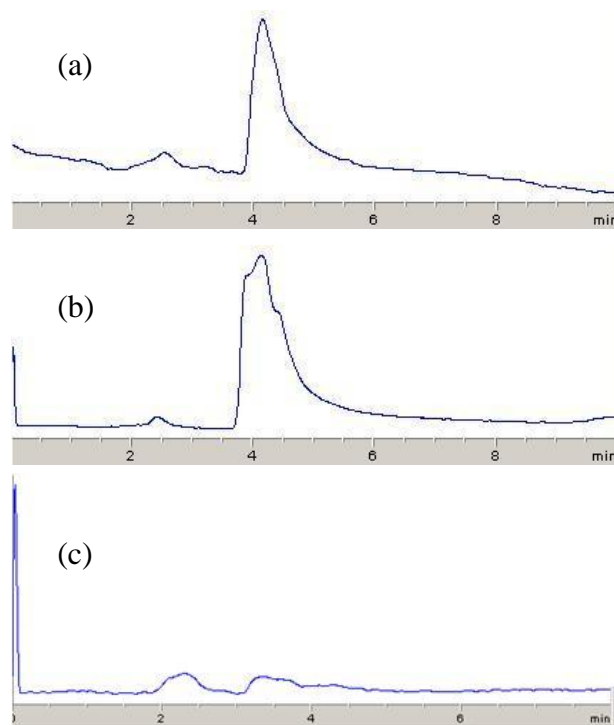

**Figure S3.** Chromatogram of (a) standard doxorubicin solution, (b) released doxorubicin products from the COOH-Dox/SiNPs and (c) doxorubicin suspended in  $\text{NH}_4\text{OH}$ .

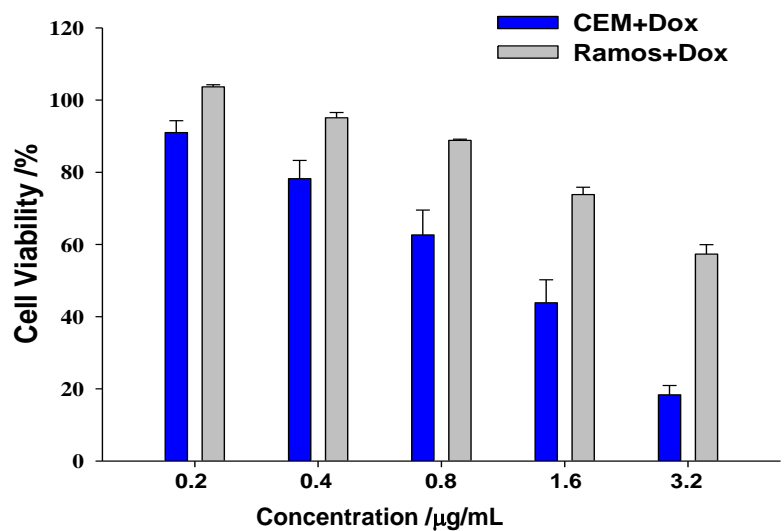

**Figure S4.** Cytotoxicity assays of free Dox with CEM and Ramos cells.

**Table S1.** Anticancer efficacy comparison of COOH-Dox/SiNPs with free Dox.

| Concentration<br>Cells viability | Free Dox Concentration<br>(µg/mL) |            |            | (Encapsulated Dox concentration)/<br>(COOH-Dox/SiNPs Concentration)<br>(µg/mL) |            |            |
|----------------------------------|-----------------------------------|------------|------------|--------------------------------------------------------------------------------|------------|------------|
|                                  | 0.4                               | 0.8        | 1.6        | 0.42/10                                                                        | 0.84/20    | 1.68/40    |
| CEM Cells<br>viability (%)       | 78.24±5.04                        | 62.64±6.89 | 43.84±6.37 | 77.64±8.37                                                                     | 58.37±9.57 | 34.98±6.08 |
| Ramos Cells<br>viability (%)     | 95.09±1.45                        | 88.83±0.33 | 73.80±2.03 | 99.79±7.87                                                                     | 85.26±2.78 | 66.46±1.02 |
